# Supplementary figures and images for: A Framework for Compiling Quantifications of Marine Biosecurity Risk Factors Associated With Common Vessel Types
Source: Frontiers journal article supplement (doi:10.3389/fmars.2021.723782), 2021-09-28

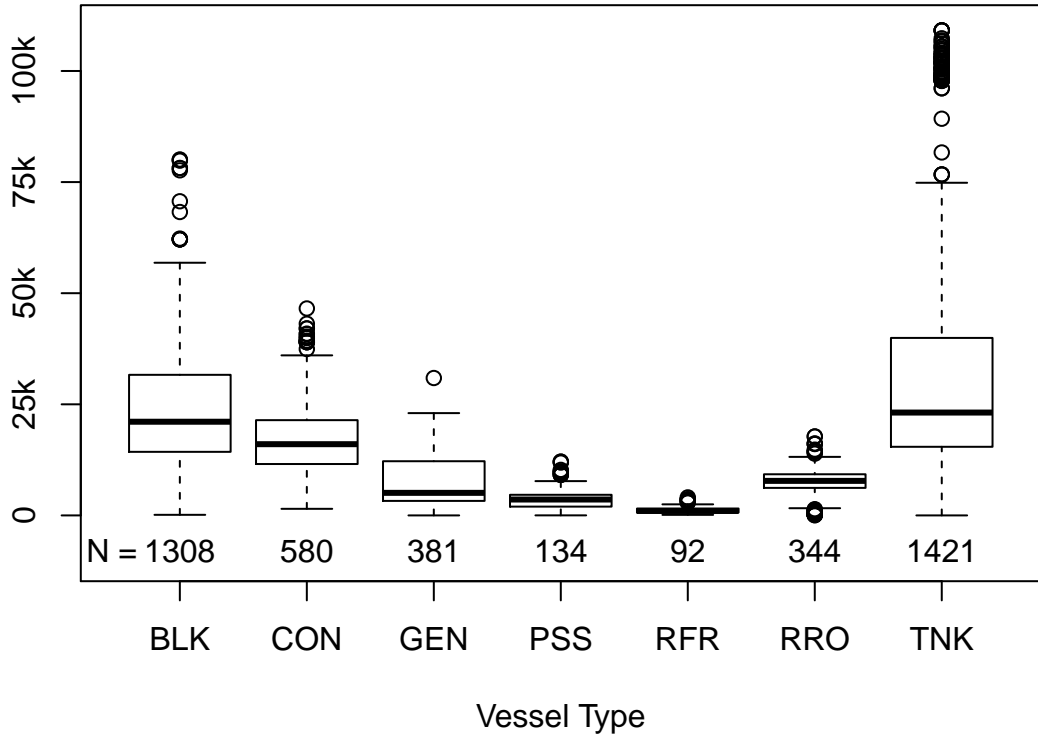

Supplement: Data_Sheet_1.ZIP [file Data_Sheet_1.ZIP]

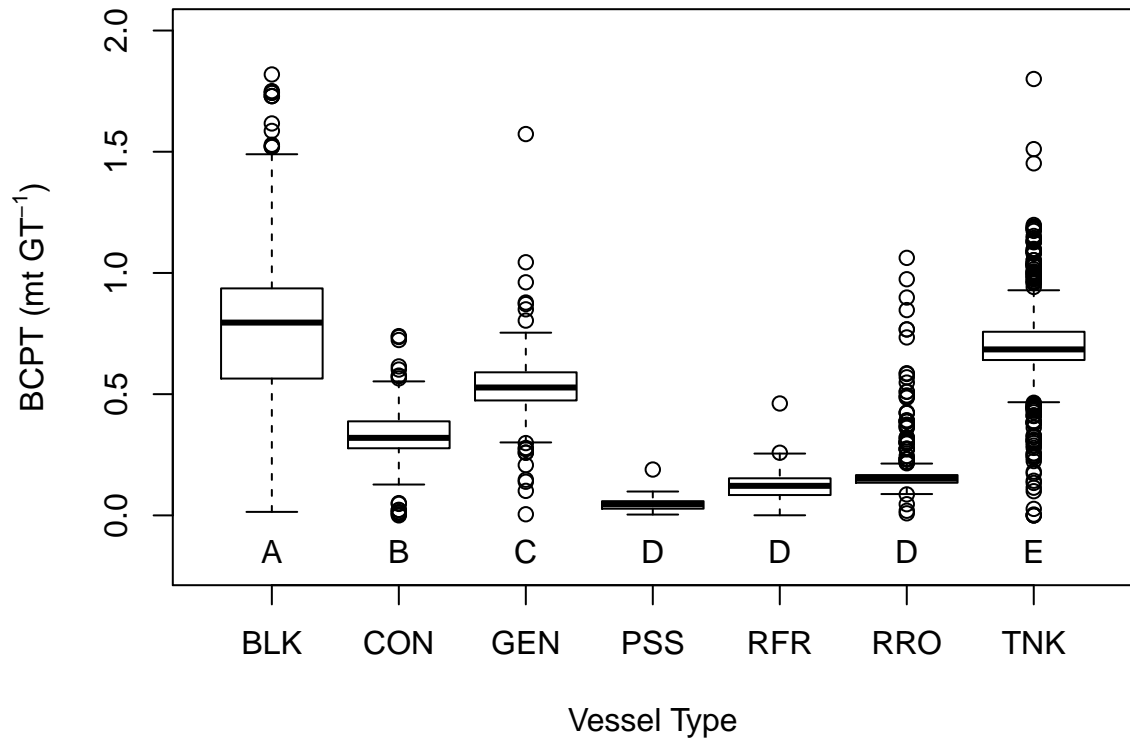

Supplement: Data_Sheet_1.ZIP [file Data_Sheet_1.ZIP]
